# Supplementary material for: The gut microbiome in sickle cell disease: Characterization and potential implications
Source: PubMed Central journal article supplement (PMC8386827; doi:10.1371/journal.pone.0255956), 2021-08-25
Supplement: pone.0255956.s002.pdf [file pone.0255956.s002.pdf]

## **S1 File**

The Gut Microbiome in Sickle Cell Disease: Characterization and Potential Implications

Hassan Brim<sup>1</sup>, James Taylor, Muneer Abbas, Kimberly Vilmenay, Mohammad Daremipouran, Sudhir Varma, Edward Lee, Betty Pace, Waogwende L. Song-Naba, Kalpna Gupta, Sergei Nekhai, Patricia O'Neil, and Hassan Ashktorab

### Supplementary Tables

S1 Table: Human stool samples' read counts (Ctrl. Non-SCD Controls, SCDM: SCD patients with <3 hospitalizations/year, SCDS: SCD patients with > 3 hospitalizations/year)

| Sample | Disease | Total reads | Mapped to OTUs | Mapped to chimeras | Unmapped | Total OTUs |
|--------|---------|-------------|----------------|--------------------|----------|------------|
| CTRL1  | CTRL    | 155968      | 123288         | 20350              | 12330    | 1645       |
| CTRL2  | CTRL    | 140574      | 113014         | 16340              | 11220    | 1365       |
| CTRL3  | CTRL    | 132993      | 103906         | 18173              | 10914    | 1189       |
| CTRL4  | CTRL    | 150536      | 121296         | 18354              | 10886    | 1109       |
| CTRL5  | CTRL    | 92144       | 73746          | 10603              | 7795     | 1460       |
| CTRL6  | CTRL    | 124789      | 103758         | 12137              | 8894     | 1543       |
| CTRL7  | CTRL    | 151155      | 127792         | 13257              | 10106    | 1383       |
| CTRL8  | CTRL    | 137592      | 109973         | 16661              | 10958    | 1621       |
| CTRL9  | CTRL    | 120244      | 94672          | 15560              | 10012    | 1632       |
| CTRL10 | CTRL    | 133844      | 103985         | 17938              | 11921    | 1238       |
| CTRL11 | CTRL    | 134060      | 106722         | 17508              | 9830     | 1472       |
| CTRL12 | CTRL    | 148172      | 129027         | 10001              | 9144     | 1271       |
| CTRL13 | CTRL    | 153020      | 126743         | 14968              | 11309    | 1434       |
| CTRL14 | CTRL    | 179427      | 145177         | 19861              | 14389    | 1372       |
| SCDM1  | SCDM    | 179207      | 144409         | 20932              | 13866    | 1033       |
| SCDM2  | SCDM    | 158670      | 130455         | 14627              | 13588    | 1225       |
| SCDM3  | SCDM    | 242597      | 201024         | 27317              | 14256    | 864        |
| SCDM4  | SCDM    | 170827      | 138205         | 21258              | 11364    | 1131       |
| SCDM5  | SCDM    | 151714      | 119406         | 19420              | 12888    | 1339       |
| SCDM6  | SCDM    | 212330      | 176836         | 20887              | 14607    | 938        |
| SCDM7  | SCDM    | 175172      | 149872         | 14488              | 10812    | 1298       |
| SCDS1  | SCDS    | 179983      | 150258         | 16926              | 12799    | 969        |
| SCDS2  | SCDS    | 165758      | 126589         | 26766              | 12403    | 1016       |
| SCDS3  | SCDS    | 198667      | 156083         | 25796              | 16788    | 1007       |
| SCDS4  | SCDS    | 214492      | 178392         | 22807              | 13293    | 1119       |
| SCDS5  | SCDS    | 221348      | 193045         | 16280              | 12023    | 1085       |
| SCDS6  | SCDS    | 213195      | 175869         | 21925              | 15401    | 877        |
| SCDS7  | SCDS    | 189684      | 154199         | 21989              | 13496    | 1008       |

S2 Table: Human saliva samples' read counts (Ctrl. Non-SCD Controls, SCDM: SCD patients with <3 hospitalizations/year, SCDS: SCD patients with > 3 hospitalizations/year)

| Sample | Disease | Total reads | Mapped to OTUs | Mapped to chimeras | Unmapped | Total OTUs |
|--------|---------|-------------|----------------|--------------------|----------|------------|
| CTRL1  | CTRL    | 155968      | 123288         | 20350              | 12330    | 1645       |
| CTRL2  | CTRL    | 140574      | 113014         | 16340              | 11220    | 1365       |
| CTRL3  | CTRL    | 132993      | 103906         | 18173              | 10914    | 1189       |
| CTRL4  | CTRL    | 150536      | 121296         | 18354              | 10886    | 1109       |
| CTRL5  | CTRL    | 92144       | 73746          | 10603              | 7795     | 1460       |
| CTRL6  | CTRL    | 124789      | 103758         | 12137              | 8894     | 1543       |
| CTRL7  | CTRL    | 151155      | 127792         | 13257              | 10106    | 1383       |
| CTRL8  | CTRL    | 137592      | 109973         | 16661              | 10958    | 1621       |
| CTRL9  | CTRL    | 120244      | 94672          | 15560              | 10012    | 1632       |
| CTRL10 | CTRL    | 133844      | 103985         | 17938              | 11921    | 1238       |
| CTRL11 | CTRL    | 134060      | 106722         | 17508              | 9830     | 1472       |
| CTRL12 | CTRL    | 148172      | 129027         | 10001              | 9144     | 1271       |
| CTRL13 | CTRL    | 153020      | 126743         | 14968              | 11309    | 1434       |
| CTRL14 | CTRL    | 179427      | 145177         | 19861              | 14389    | 1372       |
| SCDM1  | SCDM    | 179207      | 144409         | 20932              | 13866    | 1033       |
| SCDM2  | SCDM    | 158670      | 130455         | 14627              | 13588    | 1225       |
| SCDM3  | SCDM    | 242597      | 201024         | 27317              | 14256    | 864        |
| SCDM4  | SCDM    | 170827      | 138205         | 21258              | 11364    | 1131       |
| SCDM5  | SCDM    | 151714      | 119406         | 19420              | 12888    | 1339       |
| SCDM6  | SCDM    | 212330      | 176836         | 20887              | 14607    | 938        |
| SCDM7  | SCDM    | 175172      | 149872         | 14488              | 10812    | 1298       |
| SCDS1  | SCDS    | 179983      | 150258         | 16926              | 12799    | 969        |
| SCDS2  | SCDS    | 165758      | 126589         | 26766              | 12403    | 1016       |
| SCDS3  | SCDS    | 198667      | 156083         | 25796              | 16788    | 1007       |
| SCDS4  | SCDS    | 214492      | 178392         | 22807              | 13293    | 1119       |
| SCDS5  | SCDS    | 221348      | 193045         | 16280              | 12023    | 1085       |
| SCDS6  | SCDS    | 213195      | 175869         | 21925              | 15401    | 877        |
| SCDS7  | SCDS    | 189684      | 154199         | 21989              | 13496    | 1008       |

S3 Table: Townes mice stool samples' read counts (AA: Non-SCD mice, SS: SCD mice)

| Sample  | Genotype | Total reads | Mapped to OTUs | Mapped to chimeras | Unmapped | Total OTUs |
|---------|----------|-------------|----------------|--------------------|----------|------------|
| P3932AA | AA       | 77499       | 66396          | 2374               | 8729     | 3059       |
| P3933AA | AA       | 69366       | 60556          | 2336               | 6474     | 2669       |
| P3937AA | AA       | 69640       | 60821          | 1869               | 6950     | 2186       |
| P3946AA | AA       | 79600       | 69441          | 1991               | 8168     | 2786       |
| P3949AA | AA       | 67964       | 59557          | 1528               | 6879     | 2872       |
| P3950AA | AA       | 76722       | 67006          | 1837               | 7879     | 2999       |
| P4951AA | AA       | 75327       | 66509          | 1788               | 7030     | 2710       |
| P3914SS | SS       | 72236       | 63119          | 1796               | 7321     | 2563       |
| P3911SS | SS       | 84463       | 74666          | 1683               | 8114     | 2358       |
| P3998SS | SS       | 81612       | 71955          | 1652               | 8005     | 2666       |
| P3928SS | SS       | 86525       | 74965          | 3733               | 7827     | 2364       |
| P4248SS | SS       | 73138       | 63938          | 1665               | 7535     | 2788       |
| P3930SS | SS       | 83238       | 73681          | 1340               | 8217     | 2523       |
| P3929SS | SS       | 89258       | 79559          | 2029               | 7670     | 2503       |
| P4969SS | SS       | 107594      | 94022          | 4122               | 9450     | 2496       |
| P3936SS | SS       | 73490       | 64702          | 1846               | 6942     | 2442       |
| P3927SS | SS       | 83455       | 72231          | 2445               | 8779     | 2223       |
| P4968SS | SS       | 80278       | 71676          | 1853               | 6749     | 2303       |
| P3947SS | SS       | 69247       | 61999          | 713                | 6535     | 2091       |
| P3913SS | SS       | 88887       | 78455          | 978                | 9454     | 2687       |

S4 Table: Berk mice stool samples' read counts (AA: Non-SCD mice, SS: SCD mice)

| Sample   | Genotype | Total reads | Mapped to OTUs | Mapped to chimeras | Unmapped | Total OTUs |
|----------|----------|-------------|----------------|--------------------|----------|------------|
| G9962SS  | SS       | 83366       | 74676          | 2142               | 6548     | 2217       |
| G9951SS  | SS       | 69167       | 61524          | 1767               | 5876     | 2204       |
| G9952SS  | SS       | 59608       | 51559          | 2151               | 5898     | 2460       |
| G9969SS  | SS       | 79215       | 69894          | 2230               | 7091     | 2598       |
| G9960SS  | SS       | 75250       | 65677          | 2130               | 7443     | 2607       |
| G9961SS  | SS       | 76399       | 68495          | 1724               | 6180     | 2375       |
| G9932SS  | SS       | 82270       | 71066          | 4761               | 6443     | 2043       |
| G9936SS  | SS       | 69490       | 61390          | 2259               | 5841     | 2396       |
| G9942SS  | SS       | 83848       | 73305          | 3512               | 7031     | 2240       |
| G9943SS  | SS       | 77443       | 69317          | 1966               | 6160     | 2294       |
| G9974SS  | SS       | 71617       | 61963          | 2322               | 7332     | 2528       |
| G9975SS  | SS       | 82096       | 72345          | 2767               | 6984     | 1976       |
| G1028AA  | AA       | 72321       | 63675          | 2924               | 5722     | 1911       |
| G10029AA | AA       | 99296       | 86451          | 4523               | 8322     | 2263       |
| G10030AA | AA       | 76518       | 66368          | 2885               | 7265     | 2723       |
| G10031AA | AA       | 77078       | 68360          | 1938               | 6780     | 2615       |
| G023AA   | AA       | 69035       | 60445          | 1958               | 6632     | 2559       |
| G024AA   | AA       | 84790       | 76220          | 2106               | 6464     | 2405       |
| G022AA   | AA       | 87793       | 76011          | 4899               | 6883     | 2064       |
| G025AA   | AA       | 78933       | 69073          | 2740               | 7120     | 2486       |
| G026AA   | AA       | 90151       | 78797          | 3638               | 7716     | 2330       |
| G017AA   | AA       | 73549       | 65939          | 1686               | 5924     | 2133       |
| G018AA   | AA       | 41125       | 35116          | 1288               | 4721     | 1886       |
| G019AA   | AA       | 79133       | 70620          | 2411               | 6102     | 1822       |
